# Supplementary material for: Dried Blood Spot Biomarkers of Oxidative Stress and Inflammation Associated with Blood Pressure in Rural Senegalese Women with Incident Hypertension
Source: MDPI journal article supplement (doi:10.3390/antiox10122026), 2021-12-20
Supplement: s1 [file s1]

**Table S1.** Relative changes of blood pressure by quartiles of baseline CRP levels.

| Parameters                   | Quartiles of CRP Concentration (μg/g hemoglobin) |                     |                     |                     | <i>p</i> <sub>trend</sub> |
|------------------------------|--------------------------------------------------|---------------------|---------------------|---------------------|---------------------------|
|                              | Q1 (< 0.98)                                      | Q2 (0.98–2.05)      | Q3 (2.05–5.03)      | Q4 (>5.03)          | Value                     |
| Relative ΔsBP (95% CI, mmHg) |                                                  |                     |                     |                     |                           |
| Model 1 <sup>a</sup>         | 0.00 (ref)                                       | 1.36 (–3.58, 6.30)  | 4.66 (–0.28, 9.60)  | 3.33 (–1.60, 8.25)  | 0.10                      |
| Model 2 <sup>b</sup>         | 0.00 (ref)                                       | 0.84 (–4.26, 5.94)  | 3.82 (–1.19, 8.84)  | 2.43 (–2.56, 7.42)  | 0.20                      |
| Model 3 <sup>c</sup>         | 0.00 (ref)                                       | 1.21 (–3.95, 6.38)  | 3.78 (–1.29, 8.84)  | 2.81 (–2.29, 7.91)  | 0.18                      |
| Relative ΔdBP (95% CI, mmHg) |                                                  |                     |                     |                     |                           |
| Model 1                      | 0.00 (ref)                                       | 0.38 (–3.48, 4.23)  | 2.65 (–1.20, 6.50)  | 1.87 (–1.97, 5.71)  | 0.20                      |
| Model 2                      | 0.00 (ref)                                       | –0.63 (–4.58, 3.32) | 1.60 (–2.28, 5.49)  | 1.04 (–2.82, 4.90)  | 0.39                      |
| Model 3                      | 0.00 (ref)                                       | –0.23 (–4.21, 3.74) | 1.79 (–2.11, 5.68)  | 1.74 (–2.18, 5.67)  | 0.24                      |
| Relative ΔPP (95% CI, mmHg)  |                                                  |                     |                     |                     |                           |
| Model 1                      | 0.00 (ref)                                       | –0.99 (–4.86, 2.89) | –2.01 (–5.89, 1.86) | –1.45 (–5.32, 2.41) | 0.39                      |
| Model 2                      | 0.00 (ref)                                       | –1.47 (–5.54, 2.59) | –2.22 (–6.21, 1.77) | –1.39 (–5.36, 2.59) | 0.45                      |
| Model 3                      | 0.00 (ref)                                       | –1.45 (–5.55, 2.65) | –1.99 (–6.01, 2.02) | –1.07 (–5.12, 2.97) | 0.57                      |

Abbreviations: CI - confidence interval; sBP - systolic blood pressure; dBp - diastolic blood pressure; PP - pulse pressure; CRP - C reactive protein. a. crude model; b. adjusted for ethnic, baseline age, self-reported hypertension diagnosis, and history of asthma and cardiovascular diseases; c. adjusted for the above plus household stove types, village, and education levels.

**Table S2.** Relative changes of blood pressure by quartiles of baseline MDA levels.

| Parameters                  | Quartiles of MDA concentration (μg/g hemoglobin) |                     |                      |                     | <i>p</i> <sub>trend</sub><br>value |
|-----------------------------|--------------------------------------------------|---------------------|----------------------|---------------------|------------------------------------|
|                             | Q1 (< 91)                                        | Q2 (91–117)         | Q3 (117–155)         | Q4 (>155)           |                                    |
| Relative ΔsBP (95%CI, mmHg) |                                                  |                     |                      |                     |                                    |
| Model 1 <sup>a</sup>        | 0.00 (ref)                                       | −1.94 (−6.88, 3.00) | −4.96 (−9.90, −0.02) | −1.34 (−6.26, 3.59) | 0.38                               |
| Model 2 <sup>b</sup>        | 0.00 (ref)                                       | −1.99 (−6.95, 2.98) | −4.26 (−9.21, 0.69)  | −0.92 (−5.84, 3.99) | 0.52                               |
| Model 3 <sup>c</sup>        | 0.00 (ref)                                       | −2.08 (−7.15, 2.99) | −4.46 (−9.53, 0.62)  | −1.02 (−5.99, 3.94) | 0.49                               |
| Relative ΔdBP (95%CI, mmHg) |                                                  |                     |                      |                     |                                    |
| Model 1                     | 0.00 (ref)                                       | −0.99 (−4.84, 2.85) | −3.30 (−7.15, 0.55)  | −1.67 (−5.51, 2.16) | 0.24                               |
| Model 2                     | 0.00 (ref)                                       | −1.11 (−4.95, 2.74) | −2.92 (−6.75, 0.92)  | −1.31 (−5.12, 2.49) | 0.35                               |
| Model 3                     | 0.00 (ref)                                       | −0.67 (−4.58, 3.24) | −2.30 (−6.21, 1.61)  | −1.19 (−5.02, 2.64) | 0.40                               |
| Relative ΔPP (95%CI, mmHg)  |                                                  |                     |                      |                     |                                    |
| Model 1                     | 0.00 (ref)                                       | 0.95 (−2.93, 4.82)  | 1.66 (−2.21, 5.54)   | −0.34 (−4.20, 3.53) | 0.96                               |
| Model 2                     | 0.00 (ref)                                       | 0.88 (−3.08, 4.84)  | 1.34 (−2.61, 5.29)   | −0.39 (−4.31, 3.53) | 0.91                               |
| Model 3                     | 0.00 (ref)                                       | 1.41 (−2.61, 5.43)  | 2.16 (−1.87, 6.18)   | −0.16 (−4.10, 3.77) | 0.97                               |

Abbreviations: CI - confidence interval; sBP - systolic blood pressure; dBp - diastolic blood pressure; PP - pulse pressure; MDA - malondialdehyde. a. crude model; b. adjusted for ethnic, baseline age, self-reported hypertension diagnosis, and history of asthma and cardiovascular diseases; c. adjusted for the above plus household stove types, village, and education levels.
